# Supplementary material for: Modifying Anthocyanins Biosynthesis in Tomato Hairy Roots: A Test Bed for Plant Resistance to Ionizing Radiation and Antioxidant Properties in Space
Source: Front Plant Sci. 2022 Feb 24;13:830931. doi: 10.3389/fpls.2022.830931 (PMC8909381; doi:10.3389/fpls.2022.830931)
Supplement: Supplementary file 5 [file Table_2.XLSX]

## Sheet: gProfiler UP
source	term_name	term_id	adjusted_p_value	negative_log10_of_adjusted_p_value	term_size	query_size	intersection_size	effective_domain_size	intersections
GO:MF	serine-type endopeptidase inhibitor activity	GO:0004867	5.92683e-06	5.22718	33	165	7	17440	SOLYC03G020080.3.1,SOLYC03G020030.3.1,SOLYC07G054720.2.1,SOLYC11G020960.2.1,SOLYC08G080630.3.1,SOLYC10G086090.2.1,SOLYC10G086100.2.1
GO:MF	endopeptidase inhibitor activity	GO:0004866	0.000604961	3.21827	63	165	7	17440	SOLYC03G020080.3.1,SOLYC03G020030.3.1,SOLYC07G054720.2.1,SOLYC11G020960.2.1,SOLYC08G080630.3.1,SOLYC10G086090.2.1,SOLYC10G086100.2.1
GO:MF	peptidase inhibitor activity	GO:0030414	0.000604961	3.21827	63	165	7	17440	SOLYC03G020080.3.1,SOLYC03G020030.3.1,SOLYC07G054720.2.1,SOLYC11G020960.2.1,SOLYC08G080630.3.1,SOLYC10G086090.2.1,SOLYC10G086100.2.1
GO:MF	endopeptidase regulator activity	GO:0061135	0.000673893	3.17141	64	165	7	17440	SOLYC03G020080.3.1,SOLYC03G020030.3.1,SOLYC07G054720.2.1,SOLYC11G020960.2.1,SOLYC08G080630.3.1,SOLYC10G086090.2.1,SOLYC10G086100.2.1
GO:MF	peptidase regulator activity	GO:0061134	0.000749263	3.12537	65	165	7	17440	SOLYC03G020080.3.1,SOLYC03G020030.3.1,SOLYC07G054720.2.1,SOLYC11G020960.2.1,SOLYC08G080630.3.1,SOLYC10G086090.2.1,SOLYC10G086100.2.1
GO:MF	beta-glucosidase activity	GO:0008422	0.00765771	2.1159	19	165	4	17440	SOLYC06G073760.3.1,SOLYC01G059965.1.1,SOLYC10G045240.2.1,SOLYC12G040640.2.1
GO:MF	naringenin-chalcone synthase activity	GO:0016210	0.0254209	1.59481	2	165	2	17440	SOLYC05G053550.3.1,SOLYC09G091510.3.1
GO:MF	glucosidase activity	GO:0015926	0.0280495	1.55208	26	165	4	17440	SOLYC06G073760.3.1,SOLYC01G059965.1.1,SOLYC10G045240.2.1,SOLYC12G040640.2.1
GO:MF	enzyme inhibitor activity	GO:0004857	0.0301272	1.52104	196	165	9	17440	SOLYC05G054360.3.1,SOLYC03G020080.3.1,SOLYC03G020030.3.1,SOLYC07G054720.2.1,SOLYC11G020960.2.1,SOLYC08G080630.3.1,SOLYC10G086090.2.1,SOLYC10G018330.2.1,SOLYC10G086100.2.1
GO:BP	flavonoid biosynthetic process	GO:0009813	0.000486516	3.3129	9	123	4	13460	SOLYC05G053550.3.1,SOLYC09G091510.3.1,SOLYC02G083860.3.1,SOLYC02G085020.3.1
GO:BP	flavonoid metabolic process	GO:0009812	0.00080513	3.09413	10	123	4	13460	SOLYC05G053550.3.1,SOLYC09G091510.3.1,SOLYC02G083860.3.1,SOLYC02G085020.3.1
GO:CC	extracellular region	GO:0005576	1.85841e-05	4.73086	352	115	17	11083	SOLYC01G106650.3.1,SOLYC03G093390.3.1,SOLYC05G052245.1.1,SOLYC08G077910.3.1,SOLYC09G010860.3.1,SOLYC11G011210.2.1,SOLYC02G062510.3.1,SOLYC02G077300.2.1,SOLYC04G080760.3.1,SOLYC01G110110.3.1,SOLYC02G076710.3.1,SOLYC08G080630.3.1,SOLYC07G006570.3.1,SOLYC06G054320.1.1,SOLYC10G055190.1.1,SOLYC10G055200.1.1,SOLYC04G010270.1.1
GO:CC	Casparian strip	GO:0048226	0.04985	1.30233	3	115	2	11083	SOLYC09G010200.3.1,SOLYC10G083250.2.1
KEGG	Flavonoid biosynthesis	KEGG:00941	0.0016109	2.79293	36	31	5	2506	SOLYC12G088170.2.1,SOLYC05G053550.3.1,SOLYC09G091510.3.1,SOLYC02G083860.3.1,SOLYC09G082660.3.1
KEGG	Phenylpropanoid biosynthesis	KEGG:00940	0.0358761	1.44519	103	31	6	2506	SOLYC06G073760.3.1,SOLYC02G062510.3.1,SOLYC02G077300.2.1,SOLYC04G080760.3.1,SOLYC12G088170.2.1,SOLYC09G082660.3.1
	Query lenght 92/331

## Sheet: gProfiler DOWN
source	term_name	term_id	adjusted_p_value	negative_log10_of_adjusted_p_value	term_size	query_size	intersection_size	effective_domain_size	intersections
GO:MF	transferase activity, transferring glycosyl groups	GO:0016757	0.0294424	1.53103	529	51	8	17440	SOLYC04G016200.1.1,SOLYC04G016210.3.1,SOLYC05G053890.2.1,SOLYC12G006430.2.1,SOLYC12G013850.2.1,SOLYC05G005280.3.1,SOLYC04G077100.3.1,SOLYC01G095760.3.1
	query lenth 8/111
