# Supplementary material for: Modifying Anthocyanins Biosynthesis in Tomato Hairy Roots: A Test Bed for Plant Resistance to Ionizing Radiation and Antioxidant Properties in Space
Source: Front Plant Sci. 2022 Feb 24;13:830931. doi: 10.3389/fpls.2022.830931 (PMC8909381; doi:10.3389/fpls.2022.830931)
Supplement: Supplementary Table 1 — Primer identification (id.) as described in “Materials and Methods” for HRCs PCR screening (for, forward; rev, reverse). [file Table_1.XLSX]

## Sheet: DEGs UP
GENE ID	Log2FC	Gene description
Solyc07g043690.2.1	2.80073	3-hydroxyisobutyryl-CoA_hydrolase-like_protein_(AHRD_V3.3_***_A0A072V5U1_MEDTR)
Solyc01g105390.3.1	5.10021	Phospho-2-dehydro-3-deoxyheptonate_aldolase_(AHRD_V3.3_***_K4B2A9_SOLLC)
Solyc11g017240.2.1	3.78371	chorismate_mutase
Solyc10g075170.2.1	4.19661	Aspartate_aminotransferase_(AHRD_V3.3_*-*_A0A067JJ16_JATCU)
Solyc04g081130.1.1	3.67069	LOW_QUALITY:glyoxal_oxidase-related_protein_(AHRD_V3.3_***_AT1G19900.1)
Solyc06g073760.3.1	4.07158	Beta-glucosidase_(AHRD_V3.3_***_A0A0B4PJM3_SOYBN)
Solyc01g106650.3.1	3.00368	Xyloglucan_endotransglucosylase/hydrolase_(AHRD_V3.3_***_K4B2N2_SOLLC)
Solyc03g093390.3.1	2.39071	beta_expansin_precursor_2
Solyc05g052245.1.1	2.18678	Expansin_(AHRD_V3.3_***_G4XZW3_9GENT)
Solyc05g052250.3.1	2.19785	Expansin_(AHRD_V3.3_***_G4XZW3_9GENT)
Solyc08g077910.3.1	3.2277	Expansin-like_protein_(AHRD_V3.3_***_W9S0F1_9ROSA)
Solyc09g010860.3.1	2.63013	expansin_precursor_4
Solyc05g054360.3.1	6.83751	Pectinesterase_(AHRD_V3.3_***_K4C2B4_SOLLC)
Solyc12g088650.2.1	3.00369	cyclinD3_2
Solyc10g083930.2.1	2.36314	Peptidyl-prolyl_cis-trans_isomerase_(AHRD_V3.3_***_K4D3H9_SOLLC)
Solyc12g036657.1.1	6.81416	Tubulin_beta_chain_(AHRD_V3.3_*-*_A0A0D3BFN8_BRAOL)
Solyc03g116390.3.1	2.9627	Late_embryogenesis_abundant_protein_(AHRD_V3.3_***_E1AZA3_SOLLC)
Solyc10g080690.2.1	2.30439	Patatin_(AHRD_V3.3_***_K4D2V9_SOLLC)
Solyc01g066850.3.1	3.93129	WAT1-related_protein_(AHRD_V3.3_***_K4AWT5_SOLLC)
Solyc03g005880.3.1	3.73844	Bidirectional_sugar_transporter_SWEET_(AHRD_V3.3_***_K4BE11_SOLLC)
Solyc03g120620.3.1	2.5455	Homeobox_leucine_zipper_protein_(AHRD_V3.3_***_G7IUR3_MEDTR)
Solyc06g075640.2.1	2.25047	Tetratricopeptide_repeat_(TPR)-like_superfamily_protein_(AHRD_V3.3_*-*_AT4G20900.2)
Solyc10g083450.2.1	9.97709	NAC_domain_protein_(AHRD_V3.3_***_A0JBY8_9ASPA)
Solyc12g006680.2.1	3.64854	Early_nodulin_93_protein_(AHRD_V3.3_***_A3FGC9_9ROSI)
Solyc12g056060.2.1	3.31041	Myosin_heavy_chain-related_family_protein_(AHRD_V3.3_***_B9GX71_POPTR)
Solyc06g068190.2.1	2.02802	Ubiquitin_system_component_Cue_protein,_putative_(AHRD_V3.3_*-*_A0A061GFQ5_THECC)
Solyc02g038690.1.1	3.638	Histone_H2B_(AHRD_V3.3_***_K4B5W3_SOLLC)
Solyc06g005390.1.1	7.50548	Histone_H2B_(AHRD_V3.3_***_K4C323_SOLLC)
Solyc11g066430.1.1	2.48124	histone_H2B
Solyc03g119070.2.1	5.59731	LOW_QUALITY:Flap_endonuclease_1_(AHRD_V3.3_***_A0A0K9P479_ZOSMR)
Solyc12g035225.1.1	9.26377	BED_zinc_finger,hAT_family_dimerization_domain,_putative_(AHRD_V3.3_***_A0A061FD65_THECC)
Solyc09g008840.3.1	2.15475	Pyruvate_kinase_family_protein_(AHRD_V3.3_***_AT3G52990.1)
Solyc11g012420.2.1	3.22824	Auxin_induced-like_protein_(AHRD_V3.3_***_A0A0K9NX81_ZOSMR)
Solyc01g068410.3.1	3.20255	SlPIN5
Solyc08g061920.2.1	3.81841	cytokinin_oxidase/dehydrogenase_3
Solyc03g120530.3.1	2.05498	basic_helix-loop-helix_(bHLH)_DNA-binding_superfamily_protein_(AHRD_V3.3_*-*_AT4G29100.1)
Solyc07g026650.3.1	2.40551	1-aminocyclopropane-1-carboxylate_oxidase_5
Solyc02g083870.3.1	3.21778	Gibberellin-regulated_protein_2,_putative_(AHRD_V3.3_***_B9SLF4_RICCO)
Solyc02g083880.3.1	2.40931	Gibberellin-regulated_protein_2,_putative_(AHRD_V3.3_***_B9SLF4_RICCO)
Solyc03g116067.1.1	3.83158	Gibberellin-regulated_protein_(AHRD_V3.3_***_B4UW77_ARAHY)
Solyc11g011210.2.1	2.18994	Gibberellin-regulated_family_protein_(AHRD_V3.3_***_AT1G74670.1)
Solyc01g006580.3.1	3.19381	2-oxoglutarate-dependent_dioxygenase-related_family_protein_(AHRD_V3.3_***_B9GL08_POPTR)
Solyc01g058030.2.1	8.08401	Gibberellin_2-oxidase_(AHRD_V3.3_***_A4GVL5_SOLLC)
Solyc06g068930.2.1	3.2527	Jasmonate_ZIM_domain_protein_g_(AHRD_V3.3_***_I3WTA5_NICAT)
Solyc12g056940.2.1	2.58313	Acetyl-CoA_carboxylase_family_protein_(AHRD_V3.3_***_B9GUK0_POPTR)
Solyc02g077020.3.1	3.46247	Phospholipase_A1_(AHRD_V3.3_***_A5YW95_CAPAN)
Solyc03g083370.3.1	8.37086	Lipase_class_3_family_protein_(AHRD_V3.3_***_B9GXJ5_POPTR)
Solyc02g083340.3.1	2.40951	Phospholipase_D_(AHRD_V3.3_*-*_K4BAK2_SOLLC)
Solyc10g079110.2.1	5.34609	1-acyl-sn-glycerol-3-phosphate_acyltransferase_(AHRD_V3.3_***_Q2Z1Y8_PRUMU)
Solyc07g052695.1.1	4.56588	Beta-amylase_(AHRD_V3.3_***_K4CFG8_SOLLC)
Solyc09g092430.3.1	2.52575	Selenium_binding_family_protein_(AHRD_V3.3_***_B9GFI5_POPTR)
Solyc01g008460.3.1	2.23657	Ferredoxin_(AHRD_V3.3_***_Q70SW4_DIGLA)
Solyc09g009610.2.1	7.01047	Purple_acid_phosphatase_(AHRD_V3.3_***_K4CQZ0_SOLLC)
Solyc12g062250.2.1	2.42615	like_SEX4_1_(AHRD_V3.3_***_AT3G01510.1)
Solyc01g059980.3.1	3.45352	Beta-1,3-glucanase_(AHRD_V3.3_***_G9G7S0_HEVBR)
Solyc01g059965.1.1	3.47616	Beta-1,3-glucanase_(AHRD_V3.3_***_G9G7S0_HEVBR)
Solyc02g070450.2.1	3.08586	Glucan_endo-1,3-beta-glucosidase,_putative_(AHRD_V3.3_***_B9S109_RICCO)
Solyc01g096280.2.1	2.14537	Cytochrome_P450_(AHRD_V3.3_***_F4YF83_9APIA)
Solyc02g065230.3.1	3.17039	Cytochrome_P450_(AHRD_V3.3_***_Q8H0I6_PETHY)
Solyc02g085880.2.1	3.00531	Cytochrome_P450,_putative_(AHRD_V3.3_***_B9RSK4_RICCO)
Solyc07g064470.3.1	6.96891	Cytochrome_P450_(AHRD_V3.3_*-*_A0A061FD55_THECC)
Solyc09g059240.3.1	3.07007	Cytochrome_P450,_putative_(AHRD_V3.3_***_B9SYM4_RICCO)
Solyc10g081550.2.1	2.90271	Cytochrome_P450,_putative_(AHRD_V3.3_***_B9SYM5_RICCO)
Solyc12g044983.1.1	2.73292	Cytochrome_P450_family_protein_(AHRD_V3.3_***_B9HFV6_POPTR)
Solyc12g096840.2.1	5.31307	Tyramine_N-feruloyltransferase_4/11,_putative_(AHRD_V3.3_***_B9T0B8_RICCO)
Solyc12g049550.2.1	3.50145	GDSL_esterase/lipase_5_(AHRD_V3.3_***_GLIP5_ARATH)
Solyc10g045240.2.1	2.02221	Beta-glucosidase_(AHRD_V3.3_***_L0ASF2_POPTO)
Solyc12g040640.2.1	3.39047	Beta-glucosidase,_putative_(AHRD_V3.3_***_B9T4F7_RICCO)
Solyc02g081340.3.1	10.5348	Glutathione_S-transferase_(AHRD_V3.3_***_E1AWJ7_CAPAN)
Solyc01g108680.3.1	5.87416	Methyl_esterase_(AHRD_V3.3_***_A0A072UEL6_MEDTR)
Solyc06g062600.3.1	2.88963	Glucose-methanol-choline_(GMC)_oxidoreductase_family_protein_(AHRD_V3.3_***_AT1G72970.1)
Solyc09g091700.3.1	8.7274	NADP-dependent_alkenal_double_bond_reductase_(AHRD_V3.3_***_I3SE71_MEDTR)
Solyc02g062510.3.1	2.39234	Peroxidase_(AHRD_V3.3_***_K4B6D9_SOLLC)
Solyc02g077300.2.1	7.23652	Peroxidase_(AHRD_V3.3_***_K4B8V7_SOLLC)
Solyc04g080760.3.1	2.42913	Peroxidase_(AHRD_V3.3_***_K4BVF5_SOLLC)
Solyc01g104400.3.1	2.10332	Basic_blue_protein_(AHRD_V3.3_***_A0A151R520_CAJCA)
Solyc09g075810.3.1	2.24156	Early_nodulin-like_protein_(AHRD_V3.3_***_A0A0K9P6C2_ZOSMR)
Solyc11g062350.2.1	3.08265	Blue_copper_protein_(AHRD_V3.3_***_A0A199UNZ4_ANACO)
Solyc01g081600.3.1	2.05166	Non-specific_lipid-transfer_protein_(AHRD_V3.3_***_K4AY52_SOLLC)
Solyc03g005200.3.1	4.49382	Lipid_transfer_protein_(AHRD_V3.3_***_G7K520_MEDTR)
Solyc03g119210.1.1	2.35196	Lipid_transfer_protein_(AHRD_V3.3_***_S4TID2_GOSHI)
Solyc08g005960.2.1	2.77127	Bifunctional_inhibitor/lipid-transfer_protein/seed_storage_2S_albumin_superfamily_protein_(AHRD_V3.3_***_AT2G45180.1)
Solyc02g062975.1.1	7.08189	Glycosyltransferase_(AHRD_V3.3_*-*_K4B6I8_SOLLC)
Solyc05g013020.1.1	7.11664	Xyloglucan_alpha-1,6-xylosyltransferase_(AHRD_V3.3_***_X5MPI5_PINTA)
Solyc09g059170.2.1	8.32626	Glycosyltransferase_(AHRD_V3.3_***_M1C989_SOLTU)
Solyc10g083440.1.1	9.97248	Glycosyltransferase_(AHRD_V3.3_***_K4D3D1_SOLLC)
Solyc12g098580.1.1	3.40915	Glycosyltransferase_(AHRD_V3.3_***_K4DHN1_SOLLC)
Solyc12g098590.2.1	16.5511	Glycosyltransferase_(AHRD_V3.3_***_K4DHN2_SOLLC)
Solyc08g044270.3.1	2.64098	Glutamate_synthase,_putative_(AHRD_V3.3_*-*_B9RII5_RICCO)
Solyc01g067910.3.1	5.06112	Unknown_protein_(AHRD_V3.3_)
Solyc00g072100.3.1	2.16821	Retrovirus-related_Pol_polyprotein_from_transposon_TNT_1-94_(AHRD_V3.3_*-*_A0A151S5P0_CAJCA)
Solyc01g107100.3.1	2.71199	LOW_QUALITY:beta-1,4-xylosidase_(AHRD_V3.3_***_AT3G19615.1)
Solyc03g031890.3.1	2.97719	Oxidative_stress_3,_putative_isoform_2_(AHRD_V3.3_***_A0A061GIQ6_THECC)
Solyc03g096460.3.1	2.30214	wound/stress_protein_AY568721
Solyc03g120600.3.1	5.53926	Plant_cadmium_resistance_2_(AHRD_V3.3_***_A0A0K9NVT8_ZOSMR)
Solyc06g073990.2.1	3.81998	Gb:AAF02129.1,_putative_(AHRD_V3.3_***_A0A061GVZ4_THECC)
Solyc07g007420.3.1	3.07051	F-box/LRR-repeat_protein,_putative_(AHRD_V3.3_*-*_B9RVD1_RICCO)
Solyc07g043700.2.1	2.80073	Acylsugar_acyltransferase_3_(AHRD_V3.3_***_ASAT3_SOLLC)
Solyc07g064920.3.1	2.58206	Upstream_activation_factor_subunit_spp27_(AHRD_V3.3_***_A0A0B2NVJ3_GLYSO)
Solyc09g007070.1.1	3.11883	Succinate_dehydrogenase_assembly_factor_1,_mitochondrial_(AHRD_V3.3_***_A0A0B0PRI9_GOSAR)
Solyc09g010200.3.1	2.24802	CASP-like_protein_(AHRD_V3.3_***_K4CR48_SOLLC)
Solyc09g074550.3.1	3.38566	CASP-like_protein_(AHRD_V3.3_***_M1ASY5_SOLTU)
Solyc10g083250.2.1	2.08501	CASP-like_protein_(AHRD_V3.3_***_K4D3B2_SOLLC)
Solyc10g083410.1.1	3.53804	LOW_QUALITY:Peptidoglycan-binding_LysM_domain_protein_(AHRD_V3.3_***_A0A072VJR4_MEDTR)
Solyc11g007730.2.1	2.19516	Bark_storage_protein_A_(AHRD_V3.3_***_W9SCI4_9ROSA)
Solyc12g042530.2.1	5.30603	phosphatidylinositol-glycan_biosynthesis_class_F-like_protein_(AHRD_V3.3_***_AT1G16040.1)
Solyc12g088170.2.1	13.2135	HXXXD-type_acyl-transferase_family_protein,_putative_(AHRD_V3.3_***_A0A061E8Z9_THECC)
Solyc11g064840.1.1	7.47685	LOW_QUALITY:Calcium-dependent_lipid-binding_(CaLB_domain)_family_protein_(AHRD_V3.3_***_G7K355_MEDTR)
Solyc02g081900.3.1	7.27699	Pentatricopeptide_repeat-containing_protein_(AHRD_V3.3_***_A0A103YLQ2_CYNCS)
Solyc07g055220.2.1	3.25097	Pentatricopeptide_repeat-containing_protein,_putative_(AHRD_V3.3_***_B9T3G5_RICCO)
Solyc01g006210.3.1	3.70631	Non-structural_maintenance_of_chromosomes_element_1_(AHRD_V3.3_***_A0A118K055_CYNCS)
Solyc01g058280.3.1	2.16171	Transmembrane_93_(AHRD_V3.3_***_A0A0B0PFK3_GOSAR)
Solyc01g058733.1.1	2.11262	embryo_sac_development_arrest_7_(AHRD_V3.3_--*_AT3G56990.2)
Solyc01g066900.3.1	2.28415	cationic_amino_acid_transporter_9_(AHRD_V3.3_--*_AT1G05940.2)
Solyc01g068420.3.1	4.0737	Trichome_birefringence-like_protein_(AHRD_V3.3_***_G7IKB9_MEDTR)
Solyc01g079550.2.1	2.0748	LOW_QUALITY:Multidrug_resistance_protein_ABC_transporter_family_protein,_putative_(AHRD_V3.3_***_A0A061DZ20_THECC)
Solyc01g091455.1.1	4.23957	piezo-type_mechanosensitive_ion_channel_component_(AHRD_V3.3_--*_AT2G48060.3)
Solyc01g100440.2.1	3.11128	ATP-dependent_DNA_helicase_(AHRD_V3.3_*-*_AT2G24100.1)
Solyc01g104444.1.1	7.31939	Electron_transfer_flavoprotein-ubiquinone_oxidoreductase,_mitochondrial_(AHRD_V3.3_--*_M4CKM4_BRARP)
Solyc01g106310.3.1	5.21765	cysteine-rich/transmembrane_domain_A-like_protein_(AHRD_V3.3_-**_AT2G32210.1)
Solyc01g108420.2.1	3.16814	LOW_QUALITY:mitogen-activated_protein_kinase_kinase_kinase_3_(AHRD_V3.3_--*_AT1G53570.7)
Solyc01g109250.2.1	2.70415	LOW_QUALITY:DUF4228_domain_protein_(AHRD_V3.3_***_I3SPG4_MEDTR)
Solyc01g109430.3.1	3.49246	PPPDE_putative_thiol_peptidase_family_protein
Solyc01g111110.3.1	2.89275	Oxidoreductase/transition_metal_ion-binding_protein_(AHRD_V3.3_-**_A2Q3C9_MEDTR)
Solyc02g062980.2.1	7.04758	Glycosyltransferase_(AHRD_V3.3_*-*_K4B6I8_SOLLC)
Solyc02g063440.3.1	7.99489	cysteine-rich/transmembrane_domain_A-like_protein_(AHRD_V3.3_-**_AT2G32210.1)
Solyc02g068125.1.1	2.01192	Photosystem_II_CP43_reaction_center_protein_(AHRD_V3.3_--*_PSBC_ACUOB)
Solyc02g072460.1.1	6.98895	LOW_QUALITY:Ycf20-like_protein_(AHRD_V3.3_***_A0A1D1YWC0_9ARAE)
Solyc02g077565.1.1	4.98802	RING/U-box_superfamily_protein_(AHRD_V3.3_--*_AT1G78420.2)
Solyc02g078760.1.1	3.40119	LOW_QUALITY:BEST_plant_protein_match_is:_(TAIR:plant.1)_protein,_putative_(AHRD_V3.3_***_G7INX9_MEDTR)
Solyc02g079010.3.1	2.24273	Cotton_fiber_expressed_protein_(AHRD_V3.3_***_A0A109Y892_GOSBA)
Solyc02g089460.1.1	2.10976	Glutamine_dumper_2,_putative_(AHRD_V3.3_***_A0A061ENI6_THECC)
Solyc02g089480.1.1	7.26717	Glutamine_dumper_2,_putative_(AHRD_V3.3_***_A0A061ENI6_THECC)
Solyc02g089660.2.1	2.24841	Titin_(AHRD_V3.3_***_A0A0B0NSM2_GOSAR)
Solyc02g090120.1.1	2.47596	LOW_QUALITY:Inositol_1,4,5-trisphosphate_receptor-interacting_protein-like_2_(AHRD_V3.3_-**_A0A1D1XL30_9ARAE)
Solyc02g092285.1.1	2.58808	aminophospholipid_ATPase_3_(AHRD_V3.3_--*_AT1G59820.1)
Solyc03g006840.3.1	5.08435	LOW_protein:_M-phase_inducer_phosphatase-like_protein_(AHRD_V3.3_***_AT5G62170.1)
Solyc03g062700.3.1	2.82075	ARM_repeat_superfamily_protein_(AHRD_V3.3_***_A0A061F2F3_THECC)
Solyc03g062710.3.1	2.78575	NDH-dependent_cyclic_electron_flow_5_(AHRD_V3.3_***_A0A0F7CYY3_9ROSI)
Solyc03g095753.1.1	8.23163	Glycerol-3-phosphate_transporter_(AHRD_V3.3_*-*_A0A0A0KL51_CUCSA)
Solyc03g095810.3.1	6.92379	Trichome_birefringence-like_protein_(AHRD_V3.3_***_G7K771_MEDTR)
Solyc03g096410.1.1	3.52589	LOW_QUALITY:ARID/BRIGHT_DNA-binding_,_ELM2_domain_and_myb-like_DNA-binding_domain-containing_protein_(AHRD_V3.3_--*_AT4G11400.2)
Solyc03g020100.2.1	3.60025	LOW_QUALITY:Protein_Ycf2_(AHRD_V3.3_--*_YCF2_VITVI)
Solyc03g020080.3.1	2.01793	Pin-II_type_proteinase_inhibitor_69_(AHRD_V3.3_***_A0A097J9C9_CAPAN)
Solyc03g020030.3.1	10.729	Pin-II_type_proteinase_inhibitor_69_(AHRD_V3.3_***_A0A097J9C9_CAPAN)
Solyc03g019877.1.1	2.04172	TSL-kinase_interacting_protein_1_(AHRD_V3.3_--*_AT2G36960.3)
Solyc03g110890.1.1	4.0143	LOW_QUALITY:glucuronoxylan_4-O-methyltransferase-like_protein_(DUF579)_(AHRD_V3.3_***_AT4G24910.1)
Solyc03g110987.1.1	2.90116	Transducin/WD40_repeat-like_superfamily_protein_(AHRD_V3.3_--*_AT4G11270.2)
Solyc03g114705.1.1	3.17206	DELLA_protein_(AHRD_V3.3_--*_Q0HA73_MALDO)
Solyc03g116800.3.1	2.32366	glutamate_receptor_2.5_(AHRD_V3.3_--*_AT5G11210.9)
Solyc04g011495.1.1	4.7893	LOW_QUALITY:transmembrane_protein_(AHRD_V3.3_***_AT4G26055.1)
Solyc04g011735.1.1	3.47259	methyl-CPG-binding_domain_7_(AHRD_V3.3_--*_AT5G59800.1)
Solyc04g014280.1.1	6.96898	LOW_QUALITY:hydroxyproline-rich_glycoprotein_family_protein_(AHRD_V3.3_***_AT5G09520.1)
Solyc04g014520.1.1	3.7535	LOW_QUALITY:Transmembrane_protein_45B_(AHRD_V3.3_***_A0A151U0K4_CAJCA)
Solyc04g016070.2.1	4.77358	LOW_QUALITY:MADS-box_transcription_factor_(AHRD_V3.3_***_A0A023JBP0_9ROSI)
Solyc04g058100.3.1	2.21524	Metallothionein-like_protein_type_2_(AHRD_V3.3_***_MT2X_SOLLC)
Solyc04g063200.1.1	6.89899	LOW_QUALITY:PH01B035L11.21_protein_(AHRD_V3.3_--*_L0P1Q5_9POAL)
Solyc04g071600.3.1	2.11088	Abscisic_acid_stress_ripening_5
Solyc04g077230.1.1	2.69543	Indole-3-acetaldehyde_oxidase_(AHRD_V3.3_--*_ALDO1_MAIZE)
Solyc05g007750.3.1	7.11871	Cysteine-rich_receptor-like_protein_kinase_40_(AHRD_V3.3_--*_CRK40_ARATH)
Solyc05g008150.3.1	5.52827	Metallocarboxypeptidase_inhibitor_(AHRD_V3.3_***_O24373_SOLTU)
Solyc05g050720.3.1	2.23421	Preprotein_translocase_subunit_SECE1_(AHRD_V3.3_***_A0A1D1Z4R7_9ARAE)
Solyc05g051740.3.1	3.35324	Prosystemin_(AHRD_V3.3_--*_O48857_SOLNI)
Solyc05g052880.3.1	3.2055	Plant/T7H20-70_protein_(AHRD_V3.3_***_A0A072U1L2_MEDTR)
Solyc05g054435.1.1	4.0089	DNA_replication_complex_GINS_protein_PSF2_(AHRD_V3.3_*-*_M1C604_SOLTU)
Solyc06g005300.3.1	3.88556	TOX_high_mobility_group_box_family_member_4-A,_putative_isoform_1_(AHRD_V3.3_***_A0A061H046_THECC)
Solyc06g050610.2.1	6.89028	DCD_(Development_and_Cell_Death)_domain_protein_(AHRD_V3.3_*-*_AT3G11000.1)
Solyc06g050870.3.1	5.32258	Hypoxia-responsive_family_protein_(AHRD_V3.3_***_A0A061FYY0_THECC)
Solyc06g053805.1.1	3.98478	cytochrome_P450,_family_71,_subfamily_B,_polypeptide_30_pseudogene_(AHRD_V3.3_--*_AT3G53290.1)
Solyc06g060570.3.1	9.24069	Dihydrofolate_reductase_(AHRD_V3.3_***_A0A0B0NHA3_GOSAR)
Solyc06g062795.1.1	8.48478	LOW_QUALITY:DUF3511_domain_protein_(AHRD_V3.3_--*_G7LI91_MEDTR)
Solyc06g067980.3.1	2.63185	Late_embryogenesis_abundant_protein_(AHRD_V3.3_--*_Q2QKE8_CATRO)
Solyc06g074260.3.1	6.93225	pollen_proteins_Ole_e_I-like
Solyc06g082320.3.1	7.05527	Pentatricopeptide_repeat-containing_protein_At5g12100,_mitochondrial_(AHRD_V3.3_***_A0A1D1Z416_9ARAE)
Solyc06g083560.3.1	8.8095	transducin_family_protein_/_WD-40_repeat_family_protein_(AHRD_V3.3_--*_AT5G08560.3)
Solyc06g084170.3.1	2.72848	low-molecular-weight_cysteine-rich_56_(AHRD_V3.3_-**_AT3G20993.1)
Solyc06g084180.3.1	2.59353	Plant_thionin_family_protein_(AHRD_V3.3_-**_AT2G20619.1)
Solyc07g006020.3.1	2.30823	ADIPOR-like_receptor_(AHRD_V3.3_***_W9QY38_9ROSA)
Solyc07g007750.3.1	4.77365	Defensin_protein_(AHRD_V3.3_***_B1N678_SOLLC)
Solyc07g008015.1.1	2.72176	Surfeit_locus_protein_5_subunit_22_of_Mediator_complex_(AHRD_V3.3_--*_AT1G16430.1)
Solyc07g054720.2.1	4.77854	Type_II_proteinase_inhibitor_family_protein_(AHRD_V3.3_-**_B6SSS5_MAIZE)
Solyc07g054810.1.1	3.50199	LOW_QUALITY:glutamate-1-semialdehyde_2,1-aminomutase_2_(AHRD_V3.3_--*_AT3G48730.1)
Solyc07g061890.1.1	7.07393	LOW_QUALITY:Heat_stress_transcription_factor_B-4b,_putative_(AHRD_V3.3_***_A0A061FAG8_THECC)
Solyc07g063170.1.1	2.04251	Sodium/calcium_exchanger_family_protein_(AHRD_V3.3_--*_AT5G17850.2)
Solyc07g064690.1.1	2.07755	LOW_QUALITY:50S_ribosomal_protein_L34_(AHRD_V3.3_***_AT1G29040.1)
Solyc08g048400.2.1	6.00022	RNA_helicase,_ATP-dependent,_SK12/DOB1_protein_(AHRD_V3.3_--*_AT3G46960.3)
Solyc08g075705.1.1	4.25807	thioredoxin_Y2_(AHRD_V3.3_--*_AT1G43560.1)
Solyc08g076570.3.1	3.85936	Phosphatidylinositol-glycan_biosynthesis_class_X_protein,_putative_(AHRD_V3.3_***_A0A061GDT5_THECC)
Solyc08g081470.3.1	2.05026	3-isopropylmalate_dehydratase_large_subunit_(AHRD_V3.3_***_A0A0B0Q086_GOSAR)
Solyc09g055860.1.1	5.40704	LOW_QUALITY:Plant_invertase/pectin_methylesterase_inhibitor_superfamily_protein_(AHRD_V3.3_--*_AT2G31432.2)
Solyc09g082810.3.1	4.78497	Glycine-rich_protein_(AHRD_V3.3_*-*_D2K2U0_TOBAC)
Solyc09g097770.3.1	2.90743	Glycine-rich_protein_(AHRD_V3.3_***_D2K2T8_TOBAC)
Solyc10g006120.2.1	7.35787	extracellular_ligand-gated_ion_channel_protein_(DUF3537)_(AHRD_V3.3_***_AT3G20300.1)
Solyc10g006550.2.1	6.14616	Protein_DETOXIFICATION_(AHRD_V3.3_--*_A0A0D3HQG4_9ORYZ)
Solyc10g049760.1.1	3.99126	Signal_anchor,_putative_(AHRD_V3.3_*-*_A0A072UJ16_MEDTR)
Solyc10g050980.1.1	5.84312	PAB-dependent_poly(A)-specific_ribonuclease_subunit_PAN2_(AHRD_V3.3_-**_A0A1D1XPR6_9ARAE)
Solyc10g050990.1.1	5.93481	Pyruvate_kinase_(AHRD_V3.3_--*_A9TZX1_PHYPA)
Solyc10g076400.2.1	2.65009	Trichome_birefringence-like_protein_(AHRD_V3.3_***_G7JKP3_MEDTR)
Solyc10g079810.1.1	2.52005	LOW_QUALITY:mediator_of_RNA_polymerase_II_transcription_subunit_(AHRD_V3.3_--*_AT2G10440.2)
Solyc10g084520.1.1	2.85175	RNAse_THREE-like_protein_3_(AHRD_V3.3_--*_AT5G45150.1)
Solyc11g007130.2.1	3.0028	Hippocampus_abundant_transcript-like_protein_1_(AHRD_V3.3_***_W9QGN7_9ROSA)
Solyc11g007410.2.1	2.78455	Receptor-like_protein_kinase_(AHRD_V3.3_*-*_A0A061EYK6_THECC)
Solyc11g007860.1.1	4.086	LOW_QUALITY:Cyclin-dependent_protein_kinase_inhibitor_Siamese_(AHRD_V3.3_***_M4M6N3_GOSAR)
Solyc11g017390.2.1	7.1222	LOW_QUALITY:RNA-binding_KH_domain-containing_protein_(AHRD_V3.3_--*_AT5G46190.4)
Solyc11g020960.2.1	2.36294	Proteinase_inhibitor_II_(AHRD_V3.3_*-*_B3F0C1_TOBAC)
Solyc11g021270.1.1	2.94364	Ycf1_(AHRD_V3.3_*-*_V5NDV5_9SOLN)
Solyc11g066950.2.1	2.95599	Stress_responsive_A/B_Barrel_Domain-containing_protein_(AHRD_V3.3_***_AT5G22580.1)
Solyc11g071350.1.1	2.03744	aluminum_activated_malate_transporter_family_protein_(AHRD_V3.3_***_AT1G08440.1)
Solyc12g005800.2.1	7.51779	Myb_transcription_factor_(AHRD_V3.3_***_A0A072UKM9_MEDTR)
Solyc12g005810.1.1	7.41352	LOW_QUALITY:Exocyst_complex_component_SEC5_(AHRD_V3.3_--*_AT1G21170.2)
Solyc12g009980.2.1	2.46648	UPF0133_protein_(AHRD_V3.3_***_A0A0B2RBJ9_GLYSO)
Solyc12g019550.2.1	4.89147	Lipase_maturation_factor_2_(AHRD_V3.3_***_A0A1D1ZBR5_9ARAE)
Solyc12g035223.1.1	7.75855	Cytochrome_b561_and_DOMON_domain-containing_protein_At5g35735_(AHRD_V3.3_--*_B561P_ARATH)
Solyc12g042540.1.1	6.79878	Ephrin-A3_(AHRD_V3.3_***_A0A0B0PTB6_GOSAR)
Solyc12g049210.1.1	2.85206	LOW_QUALITY:DUF3511_domain_protein_(AHRD_V3.3_***_G7IS34_MEDTR)
Solyc12g094380.2.1	3.41203	Thioredoxin_superfamily_protein_(AHRD_V3.3_***_A0A061FEH2_THECC)
Solyc12g097035.1.1	3.39255	Small_acidic_protein_1_(AHRD_V3.3_***_A0A061EN42_THECC)
Solyc12g098800.2.1	8.02721	LOW_QUALITY:Extensin_(AHRD_V3.3_--*_Q9FSG0_NICSY)
Solyc12g098540.2.1	2.92572	Apyrase_(AHRD_V3.3_***_APY_SOLTU)
Solyc06g053510.3.1	3.105	putrescine_N-methyltransferase
Solyc06g053520.3.1	3.43764	spermidine_synthase_(AHRD_V3.3_***_AT1G23820.1)
Solyc04g039760.2.1	2.61634	Protein_Ycf2_(AHRD_V3.3_*-*_YCF2_SOLLC)
Solyc05g047440.1.1	3.45975	LOW_QUALITY:Ycf1_protein_(AHRD_V3.3_*-*_ATCG01130.1)
Solyc09g031830.1.1	2.24584	Protein_Ycf2_(AHRD_V3.3_*-*_YCF2_TOBAC)
Solyc10g018990.2.1	2.63848	Protein_Ycf2_(AHRD_V3.3_*-*_YCF2_SOLLC)
Solyc08g076980.3.1	7.47444	Acetylornithine_deacetylase_(AHRD_V3.3_***_ARGE_ARATH)
Solyc10g081300.1.1	2.56472	Metacaspase_9_(AHRD_V3.3_***_M4Y069_CAPAN),Pfam:PF00656
Solyc01g110110.3.1	2.17735	Cysteine_proteinase_(AHRD_V3.3_***_C0KIY3_SOLLC)
Solyc02g076710.3.1	2.30799	Cysteine_protease_(AHRD_V3.3_***_Q7XYU8_ANTAD)
Solyc05g005310.2.1	3.37833	NEDD8-specific_protease_1_(AHRD_V3.3_***_W9SIH8_9ROSA)
Solyc08g080630.3.1	2.33279	Ethylene-responsive_proteinase_inhibitor_1_(AHRD_V3.3_***_IER1_SOLLC)
Solyc10g086090.2.1	2.2472	Trypsin_inhibitor_1_(AHRD_V3.3_***_ITR1_NICSY)
Solyc01g096560.2.1	4.10931	Subtilisin-like_protease_(AHRD_V3.3_***_A0A0B2PRM9_GLYSO)
Solyc03g007470.3.1	2.30181	Ubiquitin-conjugating_enzyme_E2_(AHRD_V3.3_***_A0A0K9PK38_ZOSMR)
Solyc11g065190.2.1	3.53833	Ubiquitin-conjugating_enzyme_(AHRD_V3.3_***_G7K9A0_MEDTR)
Solyc12g010500.2.1	5.35816	RING/U-box_superfamily_protein_(AHRD_V3.3_*-*_AT3G47180.1)
Solyc12g010670.1.1	5.36403	RING/U-box_superfamily_protein_(AHRD_V3.3_*-*_AT1G74990.1)
Solyc06g043113.1.1	2.92734	Serine/threonine_protein_phosphatase_7_long_form_isogeny_(AHRD_V3.3_*-*_A0A151R878_CAJCA)
Solyc02g080790.3.1	3.31766	Deoxyhypusine_synthase
Solyc01g017087.1.1	2.61392	30S_ribosomal_protein_S18,_chloroplastic_(AHRD_V3.3_***_RR18_TOBAC)
Solyc02g011815.1.1	4.26864	30S_ribosomal_protein_S15,_chloroplastic_(AHRD_V3.3_*-*_RR15_SOLLC)
Solyc10g086330.2.1	2.0857	60S_ribosomal_protein_L23a_(AHRD_V3.3_***_RL23A_DAUCA)
Solyc11g071530.1.1	2.15078	50S_ribosomal_protein_L7/L12_(AHRD_V3.3_***_A0A0B2SQD1_GLYSO)
Solyc01g007250.3.1	2.71751	U3_small_nucleolar_ribonucleoprotein_protein_imp4,_putative_(AHRD_V3.3_***_B9RGD5_RICCO)
Solyc02g072120.3.1	2.25414	ER_lumen_protein-retaining_receptor_(AHRD_V3.3_***_K4B8I6_SOLLC)
Solyc10g047430.1.1	7.27174	LOW_QUALITY:Ribulose_bisphosphate_carboxylase_large_chain_(AHRD_V3.3_*-*_Q6SSH3_9SPER)
Solyc02g021290.1.1	3.02393	LOW_QUALITY:Photosystem_II_32_kDa_protein_(AHRD_V3.3_*-*_G4VY79_9MARC)
Solyc12g006140.2.1	4.36462	Cab-5_gene_encoding_chlorophyll_a/b-binding_protein
Solyc08g080030.3.1	5.62839	Glyoxylate_reductase_(AHRD_V3.3_***_A0A0B0NZ21_GOSAR)
Solyc04g078140.3.1	8.35042	Cytochrome_B5_(AHRD_V3.3_***_Q9ZSP7_PETHY)
Solyc06g083440.3.1	2.2417	Cytochrome_b5_(AHRD_V3.3_***_CYB5_TOBAC)
Solyc06g009420.3.1	2.47224	Pentatricopeptide_repeat-containing_protein_(AHRD_V3.3_*-*_A0A0B2SEE4_GLYSO)
Solyc07g006570.3.1	4.22185	Ribonuclease_(AHRD_V3.3_***_Q41722_ZINVI)
Solyc02g085910.3.1	3.37894	LOB_domain-containing_protein_(AHRD_V3.3_***_A0A0K9PUI8_ZOSMR)
Solyc06g053830.3.1	3.38035	auxin-regulated_IAA7
Solyc02g091440.2.1	2.12958	basic_helix-loop-helix_(bHLH)_DNA-binding_superfamily_protein_(AHRD_V3.3_*-*_AT2G14760.1)
Solyc09g065100.2.1	14.1867	bHLH_transcription_factor_150
Solyc12g088130.2.1	4.32721	basic_helix-loop-helix_(bHLH)_DNA-binding_superfamily_protein_(AHRD_V3.3_***_AT5G10570.1)
Solyc01g090760.3.1	2.25044	GATA_transcription_factor_(AHRD_V3.3_***_K4AZ17_SOLLC)
Solyc05g006310.2.1	2.85528	Zinc_finger_protein,_putative_(AHRD_V3.3_*-*_B9RSL7_RICCO)
Solyc10g078720.2.1	2.07466	Myb_family_transcription_factor_family_protein_(AHRD_V3.3_***_B9HAD3_POPTR)
Solyc07g054840.3.1	3.34123	R2R3MYB_transcription_factor_41
Solyc10g083900.2.1	3.54247	R2R3MYB_transcription_factor_27
Solyc10g086290.2.1	8.65128	R2R3MYB_transcription_factor_114
Solyc01g095640.2.1	4.92876	Myb_family_transcription_factor_(AHRD_V3.3_***_A0A0K9P4S6_ZOSMR)
Solyc07g052490.3.1	7.17307	Myb_transcription_factor_(AHRD_V3.3_*-*_A0A072UKM9_MEDTR)
Solyc04g077780.3.1	2.01957	Transcription_factor_LIM_(AHRD_V3.3_***_V9LXM6_TOBAC)
Solyc10g051140.2.1	4.84952	Enhanced_downy_mildew_2,_putative_isoform_1_(AHRD_V3.3_***_A0A061DLT4_THECC)
Solyc01g008270.3.1	2.14353	Prefoldin_subunit_5_(AHRD_V3.3_***_B6TVU2_MAIZE)
Solyc03g094000.3.1	4.10742	Light_induced_like_protein_(AHRD_V3.3_***_C1E3F8_MICCC)
Solyc06g054620.3.1	2.22328	Zinc_finger_transcription_factor_43
Solyc08g077060.3.1	2.54112	Zinc_finger,_LSD1-type_(AHRD_V3.3_***_A0A103XQX8_CYNCS)
Solyc08g082680.3.1	2.49246	RING/U-box_superfamily_protein_(AHRD_V3.3_***_AT4G24015.1)
Solyc10g007970.2.1	6.9619	WRKY_transcription_factor_77
Solyc10g084380.1.1	3.43941	WRKY_transcription_factor_44
Solyc05g053430.3.1	3.42633	DNA-directed_RNA_polymerase_subunit_(AHRD_V3.3_***_K4C223_SOLLC)
Solyc05g052650.2.1	5.1841	LOW_QUALITY:HXXXD-type_acyl-transferase_family_protein_(AHRD_V3.3_*-*_V5PZN5_9CARY)
Solyc08g080040.3.1	8.8611	Anthocyanidin_synthase_(AHRD_V3.3_***_A0A0A1E1Z9_9SOLA)
Solyc05g010320.3.1	4.30861	Chalcone-flavonone_isomerase_family_protein_(AHRD_V3.3_***_K4BXK5_SOLLC)
Solyc05g052240.3.1	8.45228	Chalcone-flavonone_isomerase_family_protein_(AHRD_V3.3_***_A0A0V0H4Z0_SOLCH)
Solyc05g053550.3.1	9.8303	chalcone_synthase_2
Solyc09g091510.3.1	12.2551	chalcone_synthase_1
Solyc02g083860.3.1	6.29961	flavanone_3-dioxygenase
Solyc02g085020.3.1	10.0946	dihydroflavonol_4-reductase
Solyc11g066580.2.1	16.3523	flavonoid_3`%2C5`-hydroxylase
Solyc01g105880.4.1	3.46907	Monoterpenoid_synthase_2
Solyc09g092470.2.1	5.69578	sesquiterpene_synthase_14
Solyc06g051130.1.1	2.79506	LOW_QUALITY:Transferase_family_protein_(AHRD_V3.3_***_B9HSL5_POPTR)
Solyc09g082660.3.1	15.0503	Caffeoyl-CoA_O-methyltransferase_(AHRD_V3.3_***_Q2YHM9_PLAMJ)
Solyc11g010990.2.1	2.01966	Alcohol_dehydrogenase,_C-terminal_(AHRD_V3.3_***_A0A103YGD7_CYNCS)
Solyc10g008200.3.1	5.1112	Tyrosine_aminotransferase,_putative_(AHRD_V3.3_***_B9RVV0_RICCO)
Solyc01g057700.1.1	7.02683	Calcium-dependent_protein_kinase_(AHRD_V3.3_*-*_H6UM40_TOBAC)
Solyc08g036590.1.1	5.41335	Calcineurin_B,_putative_(AHRD_V3.3_***_B9RCU6_RICCO)
Solyc12g009630.2.1	5.18357	Calcium-binding_family_protein_(AHRD_V3.3_***_B9HA89_POPTR)
Solyc03g031770.3.1	7.42717	ROP-interactive_CRIB_motif_protein_(AHRD_V3.3_*-*_A0A072U2K9_MEDTR)
Solyc06g051660.1.1	2.65816	Early_flowering_4_(AHRD_V3.3_***_A0A059V8X7_9ROSI)
Solyc12g049530.2.1	2.68119	Phosphoinositide_phosphatase_family_protein_(AHRD_V3.3_*-*_B9GXR7_POPTR)
Solyc10g054050.2.1	6.94672	Kinase,_putative_(AHRD_V3.3_***_B9RH93_RICCO)
Solyc10g018330.2.1	8.09991	Retrovirus-related_Pol_polyprotein_from_transposon_TNT_1-94_(AHRD_V3.3_*-*_A0A151TG49_CAJCA)
Solyc02g072393.1.1	6.96556	Receptor-kinase,_putative_(AHRD_V3.3_***_B9RVA8_RICCO)
Solyc03g093380.2.1	2.20446	protein_kinase_family_protein_(AHRD_V3.3_***_AT1G51870.2)
Solyc01g009215.1.1	2.85729	Heat_shock_family_protein_(AHRD_V3.3_***_B9HQH9_POPTR)
Solyc09g090020.3.1	2.20576	Germin-like_protein_1_(AHRD_V3.3_***_A8QK89_VITVI)
Solyc02g070410.2.1	2.40533	Disease_resistance_protein,_putative_(AHRD_V3.3_*-*_Q6L432_SOLDE)
Solyc04g072000.3.1	2.18234	Chitinase_(AHRD_V3.3_***_A0A1B1HY32_9APIA)
Solyc06g054320.1.1	2.69076	Dirigent_protein_(AHRD_V3.3_***_K4C6B8_SOLLC)
Solyc07g007760.3.1	2.15484	defensin-like_protein
Solyc10g055190.1.1	5.21636	Dirigent_protein_(AHRD_V3.3_***_K4D1B2_SOLLC)
Solyc10g055200.1.1	2.0685	Dirigent_protein_(AHRD_V3.3_***_K4D1B3_SOLLC)
Solyc10g086100.2.1	2.40634	Proteinase_inhibitor_(AHRD_V3.3_***_A0A0R4WSF0_TOBAC)
Solyc04g010270.1.1	2.35052	Dirigent_protein_(AHRD_V3.3_***_K4BPI1_SOLLC)
Solyc05g054780.2.1	2.06175	Dirigent_protein_(AHRD_V3.3_***_M1C5D5_SOLTU)
Solyc08g013970.2.1	4.30064	Disease_resistance_protein_(AHRD_V3.3_***_W9RZV6_9ROSA)
Solyc09g091210.3.1	2.18601	Dirigent_protein_(AHRD_V3.3_***_K4CWE7_SOLLC)
Solyc02g067750.3.1	6.91534	Carbonic_anhydrase_(AHRD_V3.3_***_B1VK36_SOLLC)
Solyc09g009830.3.1	2.0126	Carbonic_anhydrase_family_protein_(AHRD_V3.3_***_D7LUA2_ARALL)
Solyc03g095750.2.1	8.4733	Chlorophyllide_A_oxygenase_(AHRD_V3.3_*-*_G7I8G8_MEDTR)
Solyc09g082600.2.1	7.53436	Chlorophyllase_(AHRD_V3.3_***_F1BPW6_SOLPN)
Solyc01g105435.1.1	2.77399	ABC_transporter_G_family_member_(AHRD_V3.3_***_A0A0K9NWI5_ZOSMR)
Solyc04g010200.1.1	4.5432	ABC_transporter_G_family_member_(AHRD_V3.3_***_A0A0K9NPK2_ZOSMR)
Solyc07g064120.2.1	7.6344	ABC_transporter_B_family_protein_(AHRD_V3.3_***_G7JF16_MEDTR)
Solyc00g007130.3.1	3.65437	Amino_acid_transporter,_putative_(AHRD_V3.3_***_B9S6V9_RICCO)
Solyc03g013440.3.1	2.38187	Amino_acid_transporter,_putative_(AHRD_V3.3_***_B9T0U1_RICCO)
Solyc08g077820.3.1	3.27101	Cationic_amino_acid_transporter,_putative_(AHRD_V3.3_*-*_A0A061G4V0_THECC)
Solyc03g005980.3.1	2.18902	NOD26-like_intrinsic_protein_1.1
Solyc02g088900.3.1	2.14947	Nucleotide-sugar_transporter_family_protein_(AHRD_V3.3_***_AT3G17430.2)
Solyc05g047390.1.1	2.14259	Mitochondrial_import_receptor_subunit_TOM7-1_(AHRD_V3.3_***_TOM7A_SOLTU)
Solyc11g018535.1.1	6.8102	Metal_transporter,_putative_(AHRD_V3.3_*-*_B9S2W4_RICCO)
Solyc03g025190.4.1	16.8081	anthocyanin_permease
Solyc08g007430.2.1	2.31645	NIT2
Solyc08g066990.3.1	3.4212	Potassium_channel_(AHRD_V3.3_***_O24382_SOLTU)

## Sheet: DEGs DOWN
GENE ID	Log2FC	Gene description
Solyc02g094300.3.1	-2.60964	ACT_domain-containing_protein_(AHRD_V3.3_*-*_A0A103Y4L4_CYNCS)
Solyc05g009610.1.1	-2.12428	Alpha/beta-Hydrolases_superfamily_protein_(AHRD_V3.3_***_A0A061EB00_THECC)
Solyc08g075034.1.1	-6.67201	Pectinacetylesterase_family_protein_(AHRD_V3.3_*-*_AT5G45280.2)
Solyc02g067300.2.1	-2.85442	Structural_maintenance_of_chromosomes_protein_(AHRD_V3.3_*-*_A0A0K9Q8I9_SPIOL)
Solyc10g086460.2.1	-3.66099	Actin_(AHRD_V3.3_***_ACT1_TOBAC)
Solyc01g104780.3.1	-2.75482	Vacuolar_iron_transporter_family_protein_(AHRD_V3.3_***_A0A061DXK2_THECC)
Solyc03g096830.3.1	-2.32082	Pentatricopeptide_repeat-containing_protein,_putative_(AHRD_V3.3_***_B9S1X8_RICCO)
Solyc08g065265.1.1	-6.3173	BED_zinc_finger,hAT_family_dimerization_domain,_putative_(AHRD_V3.3_***_A0A061FD65_THECC)
Solyc01g080460.3.1	-2.09555	pyruvate_orthophosphate_dikinase_(AHRD_V3.3_***_AT4G15530.6)
Solyc04g009900.3.1	-2.01934	phosphoenolpyruvate_carboxylase_kinase
Solyc08g078330.3.1	-4.57591	2-oxoglutarate_(2OG)_and_Fe(II)-dependent_oxygenase_superfamily_protein_(AHRD_V3.3_***_AT4G16765.6)
Solyc02g022890.2.1	-3.75127	Fatty_acid_2-hydroxylase_(AHRD_V3.3_***_A0A1D1ZHT2_9ARAE)
Solyc01g102610.3.1	-3.60792	Ferric_reduction_oxidase_7_(AHRD_V3.3_***_W9RRH7_9ROSA)
Solyc08g007080.3.1	-2.04072	Type_I_inositol-1,4,5-trisphosphate_5-phosphatase_(AHRD_V3.3_***_G7JZV2_MEDTR)
Solyc02g065220.3.1	-2.14108	Cytochrome_P450_(AHRD_V3.3_***_A0A103Y530_CYNCS)
Solyc09g066150.1.1	-4.57455	Cytochrome_P450,_putative_(AHRD_V3.3_***_B9S4U5_RICCO)
Solyc12g096620.1.1	-2.38296	GDSL_esterase
Solyc12g010950.2.1	-7.8921	NADP-dependent_alkenal_double_bond_reductase_(AHRD_V3.3_***_A0A072TLD5_MEDTR)
Solyc07g063020.2.1	-2.8339	Early_nodulin-like_protein_(AHRD_V3.3_*-*_A0A072VCH6_MEDTR)
Solyc03g097440.3.1	-3.69129	Dehydrogenase/reductase_SDR_family_protein_7-like_protein_(AHRD_V3.3_***_A0A0B0P5K8_GOSAR)
Solyc04g016200.1.1	-2.96168	Glycosyltransferase_(AHRD_V3.3_***_Q8RXA4_SOLLC)
Solyc04g016210.3.1	-2.17013	Glycosyltransferase_(AHRD_V3.3_***_K4BQC1_SOLLC)
Solyc05g053890.2.1	-2.03257	Glycosyltransferase_(AHRD_V3.3_***_K4C268_SOLLC)
Solyc12g006430.2.1	-3.83524	Glycosyltransferase_(AHRD_V3.3_***_K4DBI0_SOLLC)
Solyc12g013850.2.1	-2.0368	Core-2/I-branching_beta-1,6-N-acetylglucosaminyltransferase_family_protein_(AHRD_V3.3_***_F4JIW2_ARATH)
Solyc00g019740.1.1	-2.0963	ATPase_subunit_8_(AHRD_V3.3_***_A0A0K1ZF72_SOLCA)
Solyc00g013137.1.1	-2.24668	NADH_dehydrogenase_subunit_2_(AHRD_V3.3_*-*_D5I397_CITLA)
Solyc11g030570.1.1	-2.72539	LOW_QUALITY:NADH-ubiquinone_oxidoreductase_chain_4_(AHRD_V3.3_*-*_NU4M_WHEAT)
Solyc05g005280.3.1	-2.08919	Poly_[ADP-ribose]_polymerase_(AHRD_V3.3_***_K4BW59_SOLLC)
Solyc09g007190.3.1	-2.21832	Thioredoxin_superfamily_protein_(AHRD_V3.3_***_AT2G37240.1)
Solyc07g052707.1.1	-2.32792	Formin-like_protein_(AHRD_V3.3_*-*_G8IRK0_SOLLC)
Solyc00g013181.1.1	-2.32534	S-adenosyl-L-methionine-dependent_methyltransferases_superfamily_protein_(AHRD_V3.3_--*_AT1G08125.3)
Solyc00g014860.1.1	-3.79412	LOW_QUALITY:Pectin_lyase-like_superfamily_protein_(AHRD_V3.3_--*_AT3G61490.5)
Solyc00g019990.1.1	-2.32865	LOW_QUALITY:Leucine-rich_repeat_receptor-like_protein_kinase_family_protein_(AHRD_V3.3_--*_AT2G33170.2)
Solyc00g020000.1.1	-2.1317	LOW_QUALITY:Mitogen-activated_protein_kinase_(AHRD_V3.3_--*_A0A0E0HQW2_ORYNI)
Solyc00g022090.2.1	-2.43027	Formyltetrahydrofolate_deformylase_1,_mitochondrial_(AHRD_V3.3_--*_PURU1_ARATH)
Solyc00g023580.1.1	-3.00792	Thioredoxin_superfamily_protein_(AHRD_V3.3_--*_AT1G07700.4)
Solyc00g052540.1.1	-4.00287	LOW_QUALITY:RING/FYVE/PHD_zinc_finger_superfamily_protein_(AHRD_V3.3_--*_AT3G02890.4)
Solyc00g094550.1.1	-2.82296	LOW_QUALITY:U-box_domain-containing_protein_14_(AHRD_V3.3_--*_PUB14_ARATH)
Solyc00g108550.1.1	-2.12191	LOW_QUALITY:Homeodomain-like_superfamily_protein,_putative_isoform_1_(AHRD_V3.3_*-*_A0A061G387_THECC)
Solyc00g126000.1.1	-2.14262	NADH-ubiquinone_oxidoreductase_chain_2_(AHRD_V3.3_*-*_NU2M_BETVU)
Solyc00g126010.1.1	-2.12812	LOW_protein:_NADH-ubiquinone_oxidoreductase_chain-like_protein_(AHRD_V3.3_*-*_ATMG01330.1)
Solyc00g320430.1.1	-2.03317	LOW_QUALITY:Vascular_endothelial_growth_factor_receptor_2_(AHRD_V3.3_--*_A0A1D1YH50_9ARAE)
Solyc01g104420.1.1	-4.46119	LOW_QUALITY:guanosine_nucleotide_diphosphate_dissociation_inhibitor_1_(AHRD_V3.3_--*_AT2G44100.1)
Solyc01g107460.2.1	-3.42804	LOW_QUALITY:guanosine_nucleotide_diphosphate_dissociation_inhibitor_1_(AHRD_V3.3_--*_AT2G44100.1)
Solyc01g109920.2.1	-2.41061	LOW_QUALITY:Dehydrin_protein_(AHRD_V3.3_***_V9M5C3_MANES)
Solyc01g110682.1.1	-2.14294	DNA_mismatch_repair_protein_MLH3-like_protein_(AHRD_V3.3_*-*_A0A0X7YCF6_SOLTU)
Solyc01g113450.2.1	-8.35198	LOW_QUALITY:DEAD-box_ATP-dependent_RNA_helicase_29_(AHRD_V3.3_--*_RH29_ORYSI)
Solyc02g022900.3.1	-4.98978	fatty_acid_hydroxylase_2_(AHRD_V3.3_--*_AT4G20870.2)
Solyc02g084285.1.1	-2.05422	Nuclear_pore_complex_protein_(AHRD_V3.3_--*_W9SV07_9ROSA)
Solyc02g084310.2.1	-5.66003	CTP_synthase_(AHRD_V3.3_*-*_M1BXT3_SOLTU)
Solyc02g084315.1.1	-3.82602	embryo_defective_2410_(AHRD_V3.3_--*_AT2G25660.4)
Solyc02g085940.3.1	-3.86117	Calcium-dependent_phosphotriesterase_superfamily_protein_(AHRD_V3.3_--*_AT3G59530.3)
Solyc02g091390.3.1	-2.20228	cold-regulated_protein_(AHRD_V3.3_***_AT3G03341.1)
Solyc03g098760.2.1	-5.10947	Kunitz-type_protease_inhibitor-like_protein_(AHRD_V3.3_***_Q2XPY0_SOLTU)
Solyc04g017730.1.1	-2.23886	LOW_QUALITY:30S_ribosomal_protein_S2,_chloroplastic_(AHRD_V3.3_--*_RR2_LEMMI)
Solyc04g049226.1.1	-4.18081	Pentatricopeptide_repeat-containing_protein,_mitochondrial_(AHRD_V3.3_*-*_A0A0B2Q4X7_GLYSO)
Solyc04g051490.3.1	-2.17815	essential_meiotic_endonuclease_1B_(AHRD_V3.3_*-*_AT2G22140.1)
Solyc04g077357.1.1	-2.41887	HAUS_augmin-like_complex_subunit_(AHRD_V3.3_--*_AT5G38880.1)
Solyc05g009490.2.1	-2.09518	DNA_polymerase_epsilon_catalytic_subunit_(AHRD_V3.3_--*_AT2G27120.3)
Solyc05g012805.1.1	-2.22742	transmembrane_protein_(AHRD_V3.3_***_AT3G11810.1)
Solyc05g023660.2.1	-6.32078	LOW_QUALITY:Transposase_(AHRD_V3.3_*-*_F8UTT6_SOLDE)
Solyc05g023775.1.1	-4.34892	NADH-quinone_oxidoreductase_protein_(AHRD_V3.3_*-*_A0A072V639_MEDTR)
Solyc05g023990.2.1	-6.46919	LOW_QUALITY:Leucine-rich_receptor-like_protein_kinase_family_protein_(AHRD_V3.3_--*_AT1G09970.2)
Solyc05g024190.3.1	-7.49683	Chlorophyll_synthase_(AHRD_V3.3_--*_C3W4Q2_TOBAC)
Solyc06g018004.1.1	-3.52014	tetraspanin10_(AHRD_V3.3_--*_AT1G63260.6)
Solyc06g068850.3.1	-2.43796	DCD_(Development_and_Cell_Death)_domain_protein_(AHRD_V3.3_*-*_AT5G61910.5)
Solyc06g071710.1.1	-6.44591	LOW_QUALITY:ARM_repeat_superfamily_protein_(AHRD_V3.3_--*_AT1G71020.1)
Solyc07g018390.2.1	-2.12433	RING-H2_finger_protein_2B_(AHRD_V3.3_--*_AT2G01150.2)
Solyc07g052703.1.1	-6.54639	F-box_family_protein_(AHRD_V3.3_--*_AT1G25211.1)
Solyc07g055600.1.1	-4.04893	LOW_QUALITY:Phytochrome_a_(AHRD_V3.3_--*_PHYA_SORBI)
Solyc08g008630.3.1	-3.3408	beta-carotene_isomerase_D27_(AHRD_V3.3_***_AT1G64680.2)
Solyc08g066630.2.1	-2.14531	LOW_QUALITY:F-box/LRR-repeat_protein_4_(AHRD_V3.3_*-*_A0A1D1XF78_9ARAE)
Solyc08g075032.1.1	-7.31938	Leaf_senescence_protein-like_(AHRD_V3.3_--*_Q6YWS1_ORYSJ)
Solyc09g037030.1.1	-2.01572	LOW_QUALITY:Sister-chromatide_cohesion_protein_3_(AHRD_V3.3_*-*_D7LHE4_ARALL)
Solyc09g056310.1.1	-4.9863	LOW_QUALITY:Maturase_(AHRD_V3.3_*-*_O79414_SOLTU)
Solyc09g059390.2.1	-2.254	Transducin_family_protein_/_WD-40_repeat_family_protein_(AHRD_V3.3_--*_AT5G43930.3)
Solyc09g089490.3.1	-5.21138	Proteinase_inhibitor_I_(AHRD_V3.3_***_Q3S492_SOLTU)
Solyc11g039370.2.1	-2.37308	LOW_QUALITY:Glycosyl_hydrolase_superfamily_protein_(AHRD_V3.3_--*_AT3G15800.1)
Solyc11g056440.1.1	-4.6164	LOW_QUALITY:ureide_permease_2_(AHRD_V3.3_--*_AT2G03530.4)
Solyc12g009130.2.1	-4.24982	LURP-one-like_protein_(AHRD_V3.3_***_G7IGE6_MEDTR)
Solyc12g049613.1.1	-3.69242	Glycosyltransferase_(AHRD_V3.3_--*_M1CLQ4_SOLTU)
Solyc02g082560.1.1	-2.37419	CTP_synthase_family_protein_(AHRD_V3.3_*-*_AT4G02120.5)
Solyc02g084300.1.1	-2.96553	CTP_synthase_(AHRD_V3.3_*-*_M1B2B1_SOLTU)
Solyc06g051370.1.1	-2.93365	LOW_QUALITY:Protein_Ycf2_(AHRD_V3.3_*-*_YCF2_SOLLC)
Solyc02g021220.1.1	-2.13351	Subtilisin-like_protease_(AHRD_V3.3_***_W9R4Z9_9ROSA)
Solyc12g096890.1.1	-2.36552	F-box_protein_PP2_(AHRD_V3.3_***_A0A059PC27_CICAR)
Solyc03g006960.3.1	-2.69881	Protein_phosphatase_2C_family_protein_(AHRD_V3.3_***_AT5G51760.1)
Solyc04g077100.3.1	-2.02879	Poly_[ADP-ribose]_polymerase_(AHRD_V3.3_***_K4BUE7_SOLLC)
Solyc00g180440.2.1	-2.78284	50S_ribosomal_protein_L20,_chloroplastic_(AHRD_V3.3_***_A0A0A1IRS6_9LAMI)
Solyc02g085950.3.1	-3.26723	cell_wall_protein_X77373
Solyc11g021110.2.1	-2.70872	NAD(P)H-quinone_oxidoreductase_subunit_2,_chloroplastic_(AHRD_V3.3_*-*_NU2C_ANACO)
Solyc06g008760.1.1	-3.05612	Glutaredoxin_(AHRD_V3.3_***_B3F8F2_SOLTU)
Solyc03g093630.2.1	-2.03499	Pentatricopeptide_repeat-containing_protein_(AHRD_V3.3_***_A0A0K9PNP9_ZOSMR)
Solyc09g010070.1.1	-2.01089	Pentatricopeptide_repeat_superfamily_protein_(AHRD_V3.3_***_A0A061F1A8_THECC)
Solyc03g119580.1.1	-2.66064	Solanum_lycopersicum_Cytokinin_Response_Factor_9
Solyc08g061130.3.1	-2.06881	BZIP_transcription_factor_(AHRD_V3.3_***_L0MZN5_MALDO)
Solyc00g014800.1.1	-2.17989	Zinc_finger_family_protein_(AHRD_V3.3_*-*_B9GFF8_POPTR)
Solyc02g062960.3.1	-3.53928	Homeobox-leucine_zipper_family_protein_(AHRD_V3.3_***_B9HET5_POPTR)
Solyc07g052720.3.1	-3.61036	MADS-box_transcription_factor_(AHRD_V3.3_***_A0A072UYG7_MEDTR)
Solyc01g095760.3.1	-6.31661	Glycosyltransferase_(AHRD_V3.3_***_K4AZW5_SOLLC)
Solyc04g050930.3.1	-2.07295	violaxanthin_de-epoxidase
Solyc05g010180.3.1	-2.22122	Carotenoid_isomerase_(AHRD_V3.3_***_A0A077EPD5_TOBAC)
Solyc02g030505.1.1	-3.60102	Calcium-transporting_ATPase_(AHRD_V3.3_*-*_K4D2H1_SOLLC)
Solyc08g062930.2.1	-6.67788	Calmodulin_binding_protein,_putative_(AHRD_V3.3_***_B9RQR7_RICCO)
Solyc01g010480.3.1	-2.12357	LOV/LOV_protein_(AHRD_V3.3_***_E3WH16_SOLLC)
Solyc11g069960.2.1	-2.56787	RLK-1
Solyc07g055610.2.1	-2.05561	Disease_resistance_protein_(TIR-NBS-LRR_class),_putative_(AHRD_V3.3_***_G7IQ97_MEDTR)
Solyc02g086820.3.1	-3.6679	chloroplast_carbonic_anhydrase
Solyc01g079890.3.1	-3.63711	NOD26-like_intrinsic_protein_7.1
Solyc07g014680.3.1	-2.88233	sodium_transporter_HKT1,2
